# Supplementary material for: Viral Fitness Landscapes in Diverse Host Species Reveal Multiple Evolutionary Lines for the NS1 Gene of Influenza A Viruses
Source: PubMed Central journal article supplement — Cell Rep. Author manuscript; Available in PMC 2020 Feb 10. (PMC7010214; doi:10.1016/j.celrep.2019.11.070), 2019-12-17
Supplement: NIHMS1547119-supplement-1.pdf [file NIHMS1547119-supplement-1.pdf]

**Supplemental Information**

**Viral Fitness Landscapes in Diverse Host  
Species Reveal Multiple Evolutionary Lines  
for the NS1 Gene of Influenza A Viruses**

**Raquel Muñoz-Moreno, Carles Martínez-Romero, Daniel Blanco-Melo, Christian V. Forst, Raffael Nachbagauer, Asiel Arturo Benitez, Ignacio Mena, Sadaf Aslam, Vinod Balasubramaniam, Ilseob Lee, Maryline Panis, Juan Ayllón, David Sachs, Man-Seong Park, Florian Krammer, Benjamin R. tenOever, and Adolfo García-Sastre**

# FIGURE S1

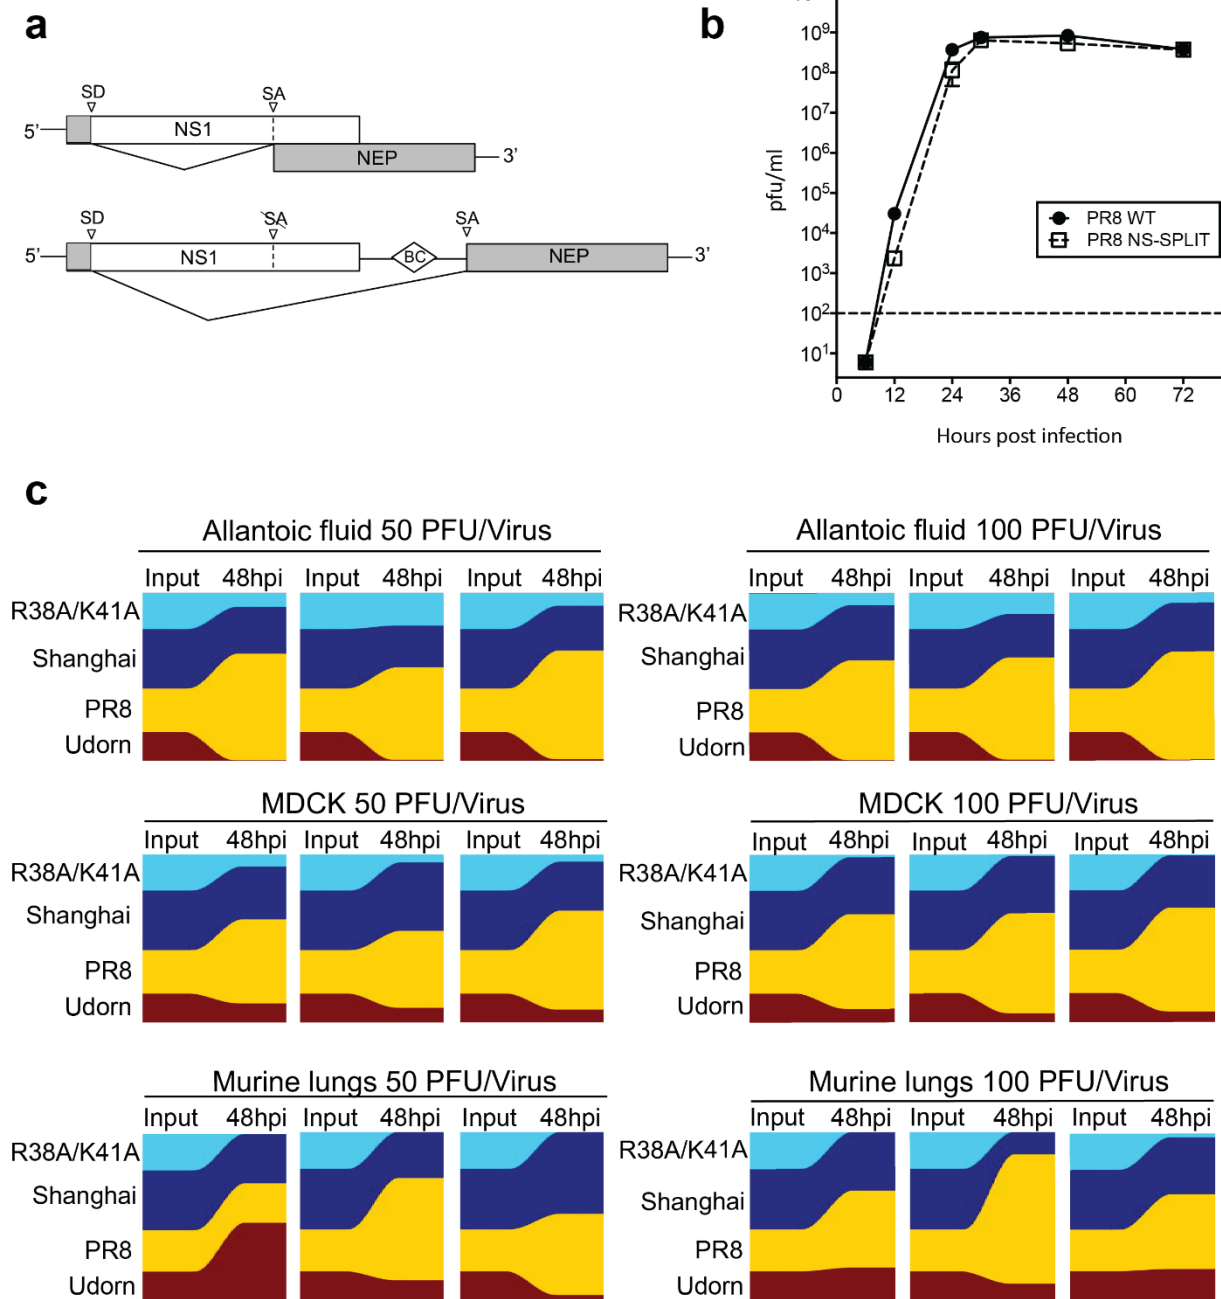

**Figure S1, related to Figure 1. Reproducible barcode-based abundance is achieved after infecting *in vitro*, *in ovo* and *in vivo* systems with a small NS1 recombinant library. (a)** Schematic representation of WT NS segment (top) and split NS segment (bottom) with modified splicing mechanism that allows the expression of NS1 and NEP in different open reading frames, flanking a short neutral barcode. **(b)** Replication comparison of a WT PR8 virus and a recombinant NS-split PR8 virus. MDCK cells were infected at a MOI of 0.001 pfu/cell. Error bars depict the standard deviation (SD) of three independent experiments. **(c)** Viral progression diagrams (Matlab) depicting the relative viral abundance present in a “proof-of-principle” library relative to the total number of barcode reads. Each color represents the relative proportion of a specific barcode within the viral population. “Input” indicates the proportion within the initial inoculum at the time of infection. 10-day-old chicken embryonated eggs (upper panels), MDCK cells (middle panels) and 8-week-old WT C57BL/6 mice (lower panels) were infected in triplicates with the viral library by adding either 50 pfu/virus or 100 pfu/virus and samples were collected 48 hours post infection.

FIGURE S2

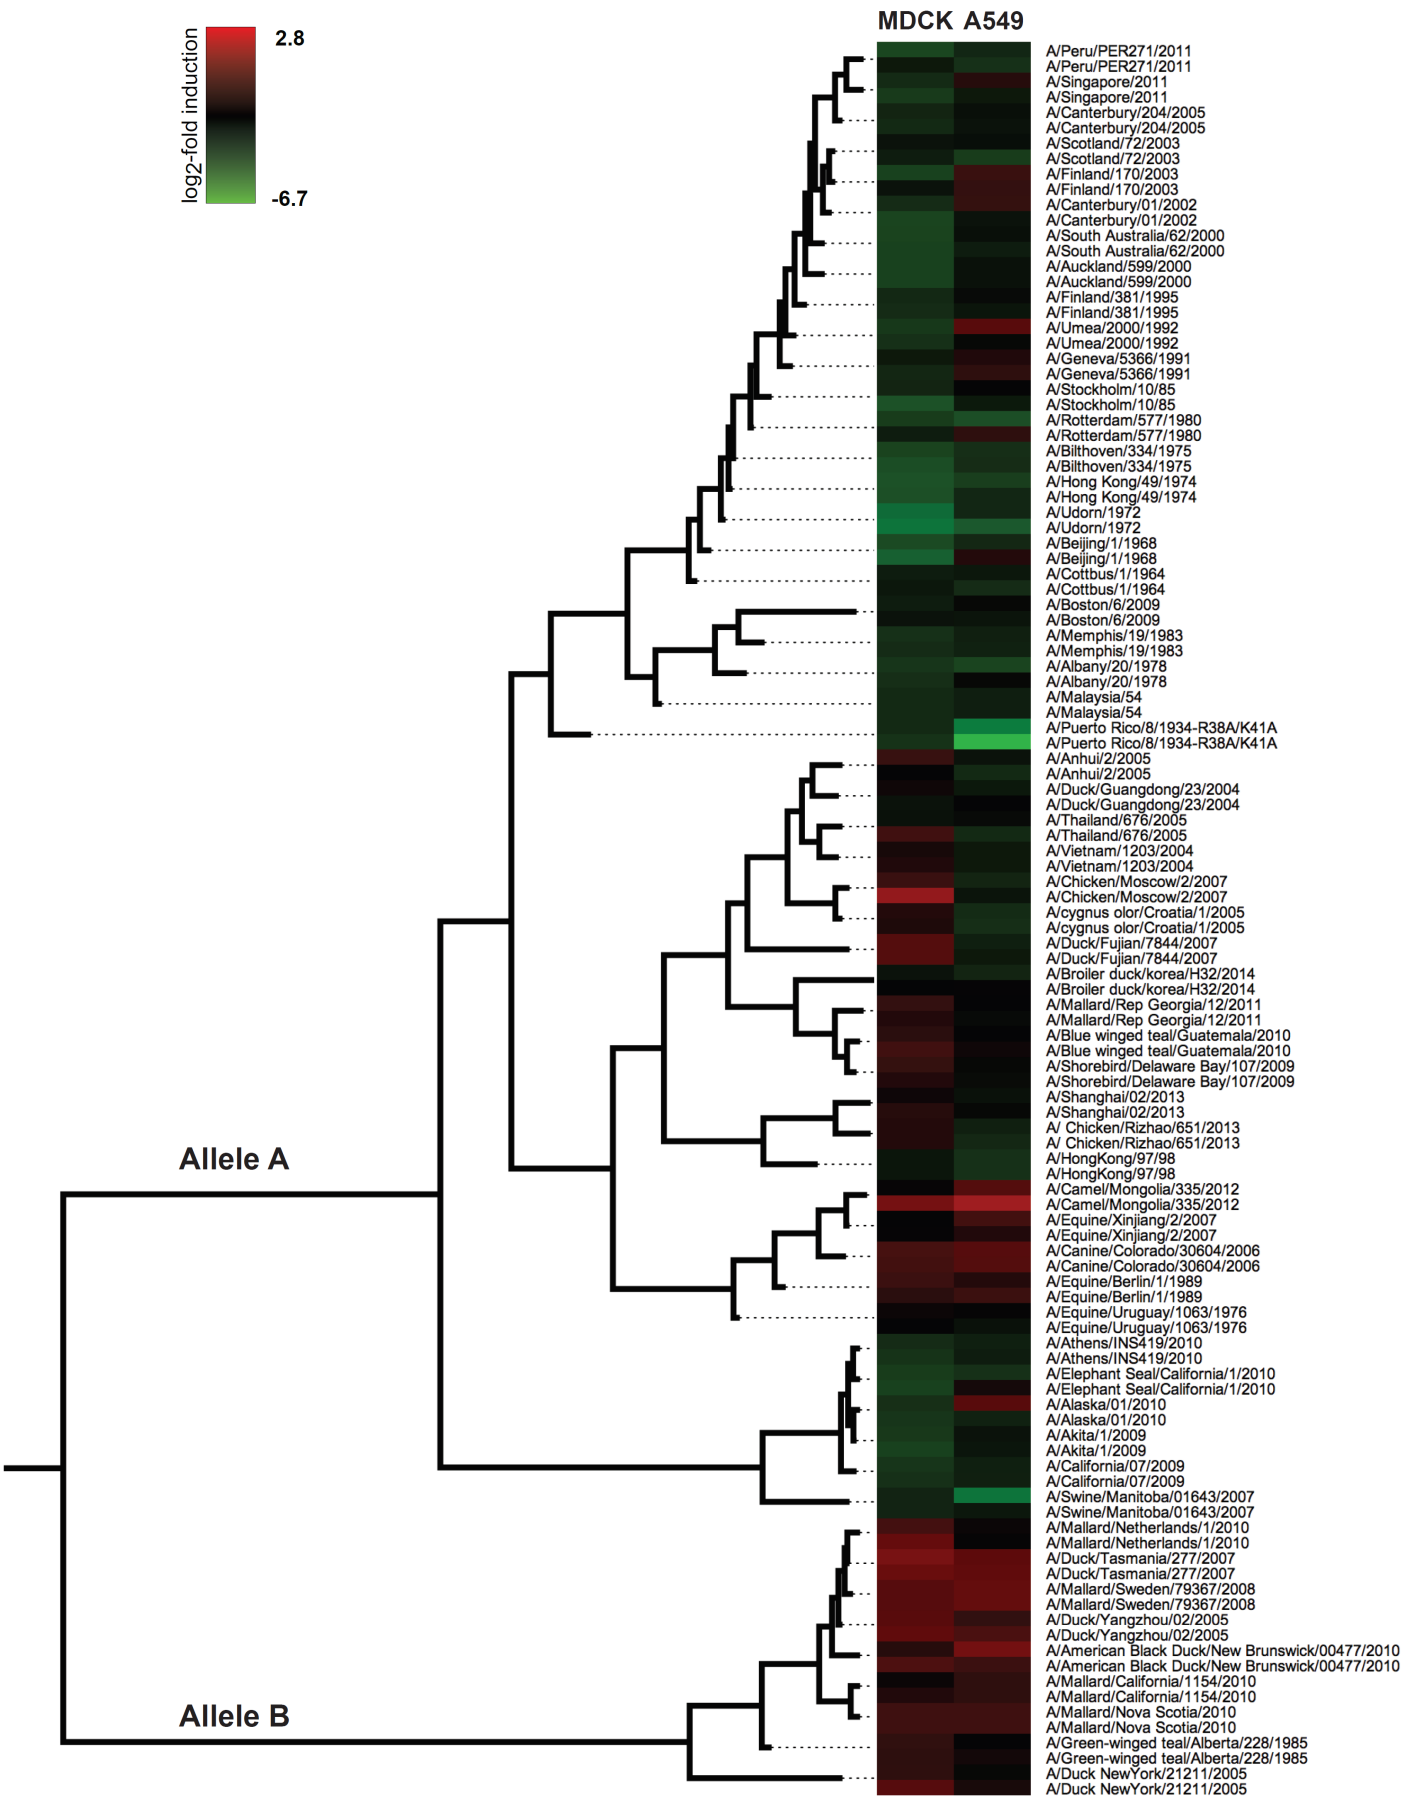

**Figure S2, related to Figure 2. Different NS1 selection profiles upon MDCK or A549 cells library infection.** Phylogenetic tree containing selected NS1 sequences within the library was assembled following Bayesian analysis (BEAST). Heat map displaying the relative abundance of barcode reads for each recombinant virus within the library upon infection of MDCK or A549 cells. Viral RNA samples were isolated at 48 hours post infection and further analyzed. Average of the triplicates are listed in columns and expressed as the  $\log_2$ -fold induction over the initial relative proportion of barcode reads found in the initial viral mix (input). Red and green colors indicate high or low barcode representation versus the input, respectively. Additional information of each specific NS1 is available in **Table 1**.



# FIGURE S3

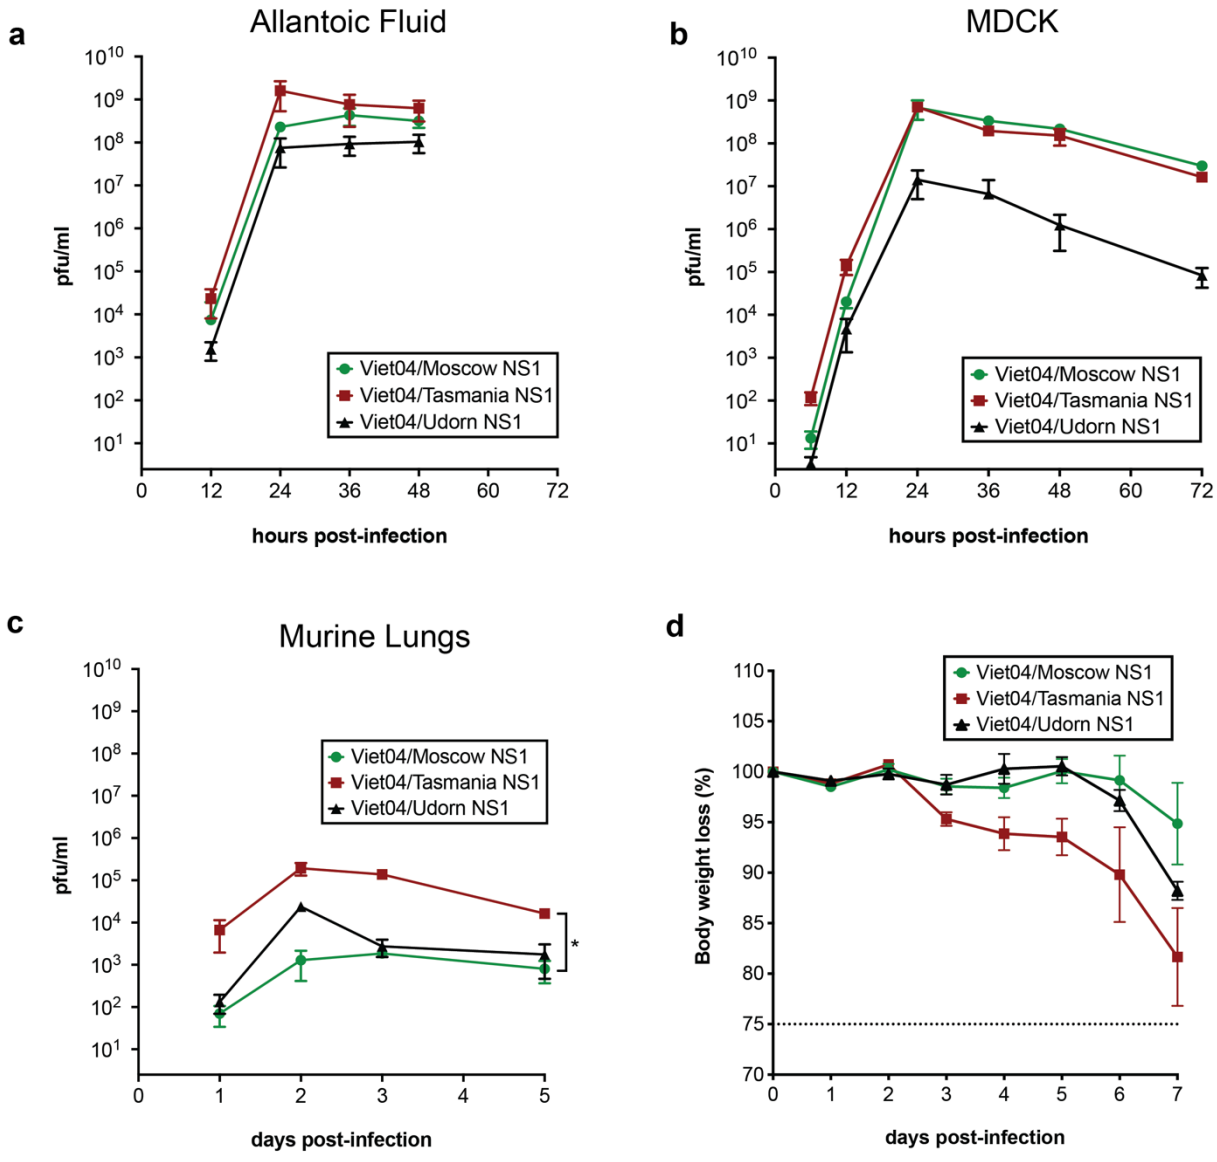

**Figure S3, related to Figure 3. Viral library profile dynamics can be reproduced in single-virus experiments in A/Vietnam/1203/04 (H5N1 HALo) background.** Same NS1 variants as in Figure 3 were rescued in a H5N1 HALo background and single-virus infections were conducted in triplicates using 10-day-old chicken embryonated eggs (a) MDCK cells (b) and 8-week-old C57BL/6 mice (c). Viral replication was quantified at different time points post infection. Body weight loss of infected mice was daily monitored (d). Error bars depict the standard deviation (SD). \*,  $p < 0.05$ .

# FIGURE S4

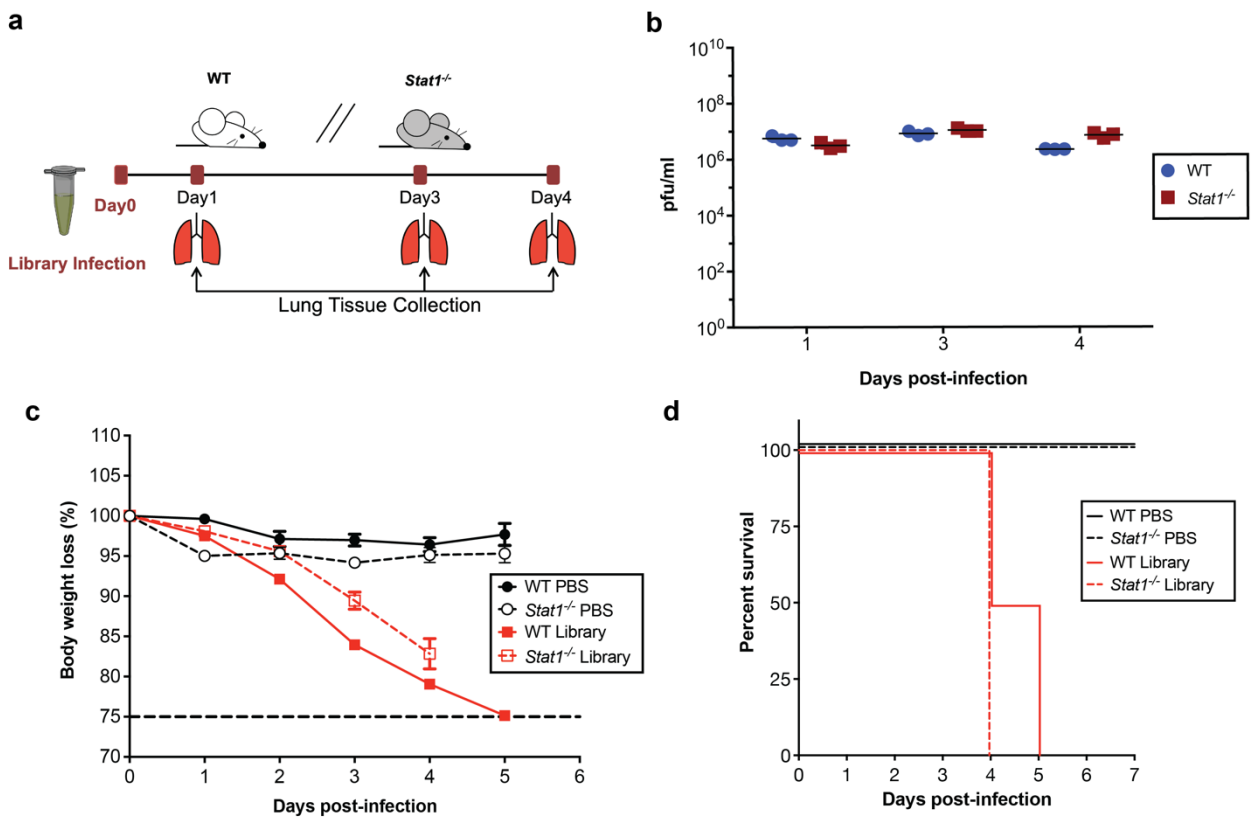

**Figure S4, related to Figure 5. NS1 library selection profile depends on the type-I IFN response.** (a) Experimental layout of library infection in 129S wild type (WT) and 129S *Stat1*<sup>-/-</sup> mice (n=4). (b) Mouse lung viral titers were determined by plaque assay on MDCK cells at days 1, 3 and 4 post-infection. (c) Body weight loss and (d) survival rates were daily monitored during the infection. Error bars depict the standard deviation (SD).

# FIGURE S5

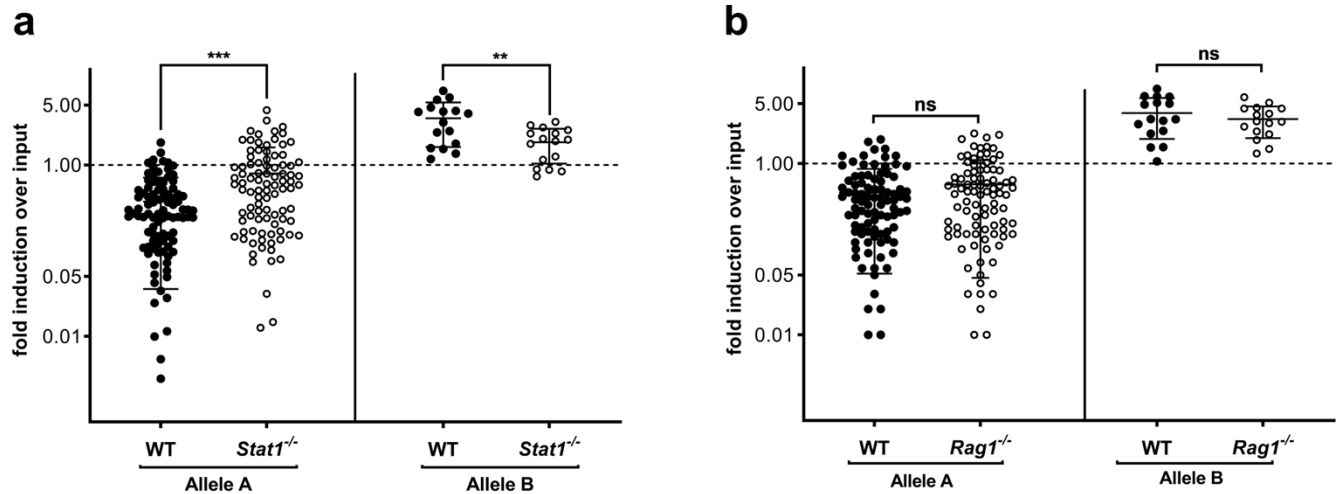

**Figure S5, related to Figure 5. Differences in fitness between allele A and allele B NS1.** Scatter plot graphs depicting the abundance profiles of viruses containing allele A or allele B NS1 within the library. Average of the triplicates are represented as the fold induction over the input (initial relative proportion of barcode reads found in the viral mix) and represented in a log<sub>2</sub> scale. Profiles from *Stat1*<sup>-/-</sup> at 3 days post-infection (a) and *Rag1*<sup>-/-</sup> mice at 4 days post infection (b) are shown. Error bars depict the standard deviation (SD). \*, P<0.05; \*\*, P<0.01; \*\*\*, P<0.001.

**FIGURE S6**

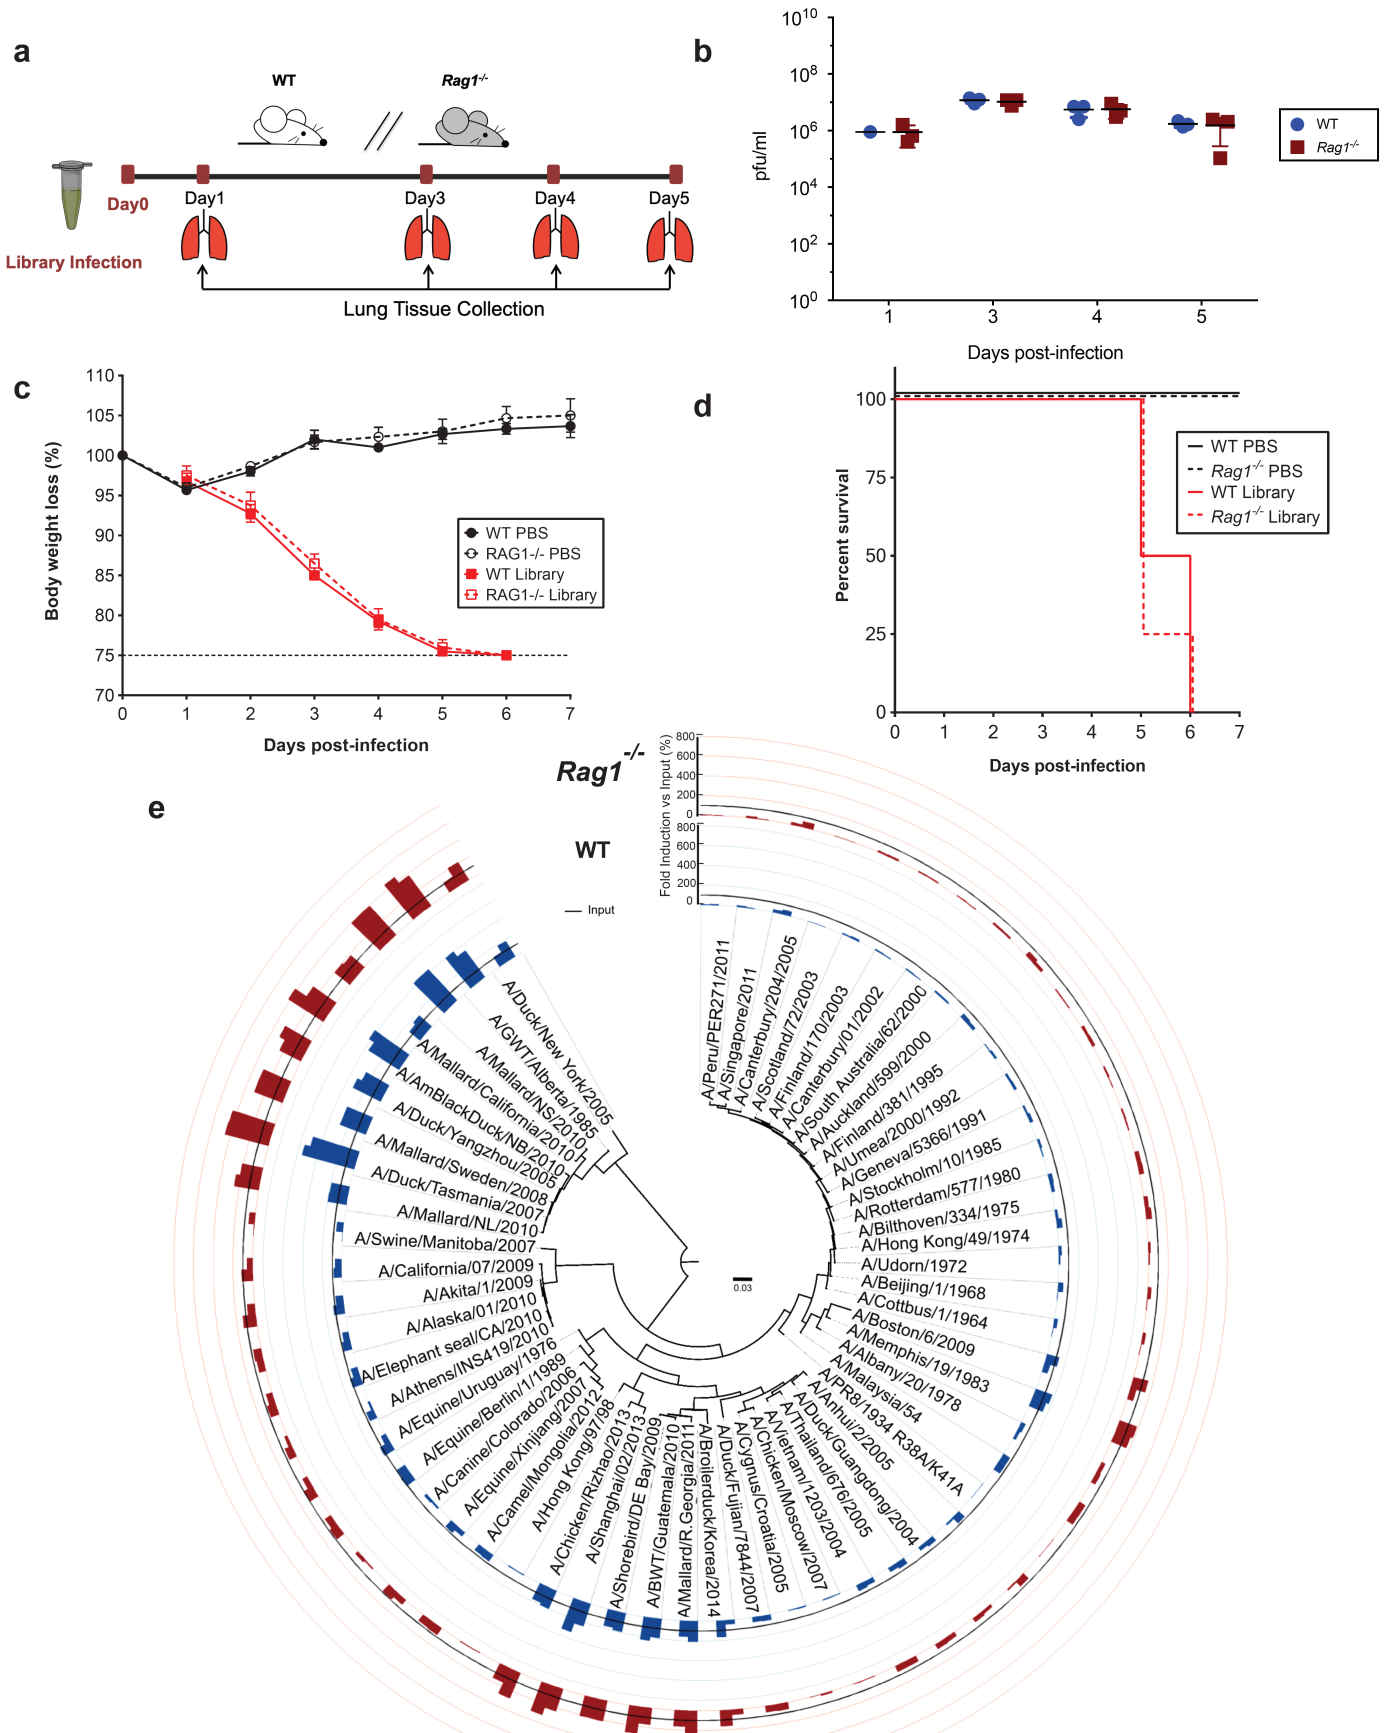

**Figure S6, related to Figure 5. NS1 library selection profile is early host adaptive immune response independent.** (a) Experimental layout of library infection in C57BL/6 wild type (WT) and C57BL/6 *Rag1*<sup>-/-</sup> mice. (b) Lung tissue from infected mice (n=3) were collected and homogenized at the indicated timepoints. Viral titers were determined by plaque assay on MDCK cells. Additionally, weight loss (c) and survival rates (d) were daily monitored during the infection. (e) Circular bar graph comparing results obtained from infecting WT or *Rag1*<sup>-/-</sup> at day 4 post infection and expressed as the relative barcode-fold increase percentage over the input. Error bars depict the standard deviation (SD).

# DATA S1

a

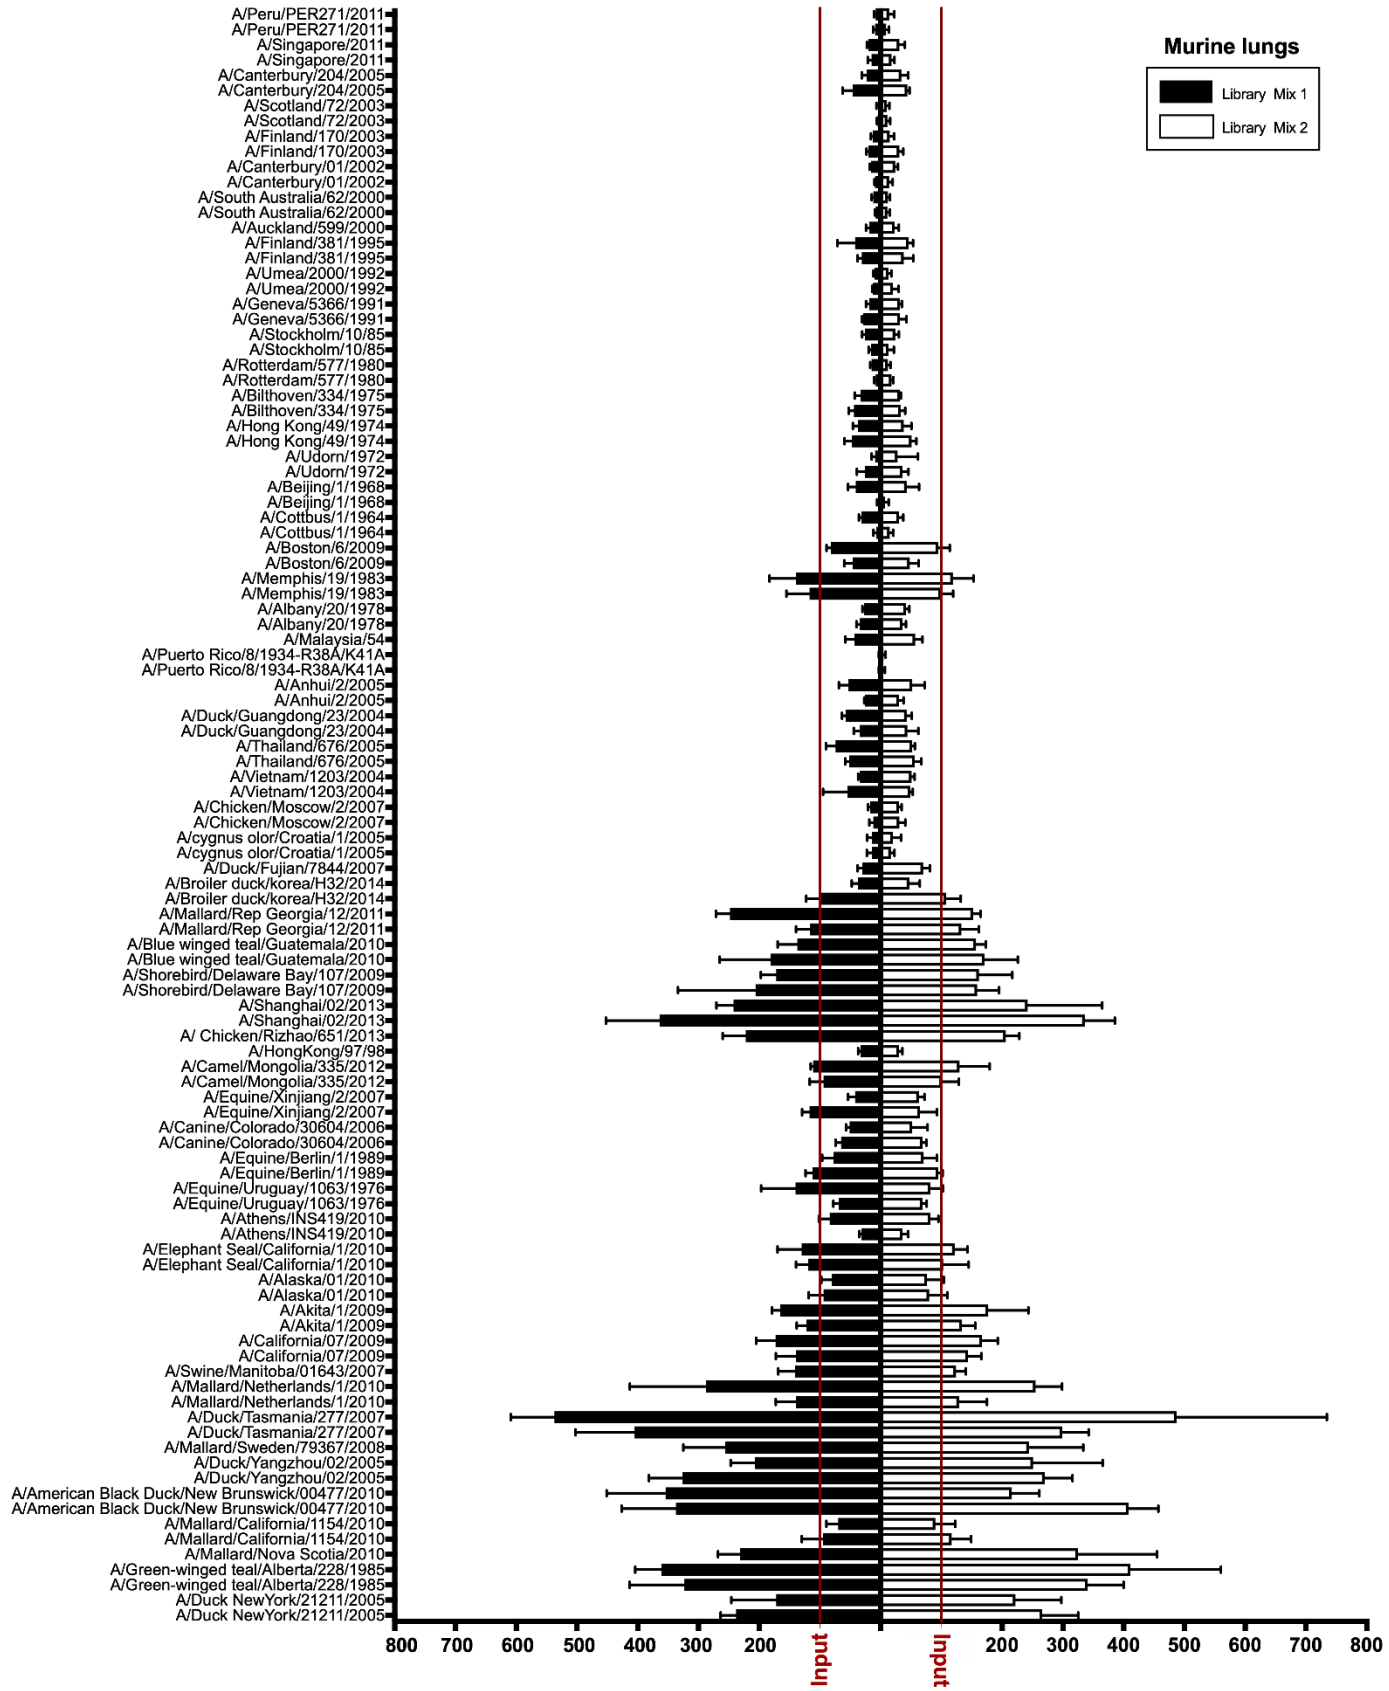

b

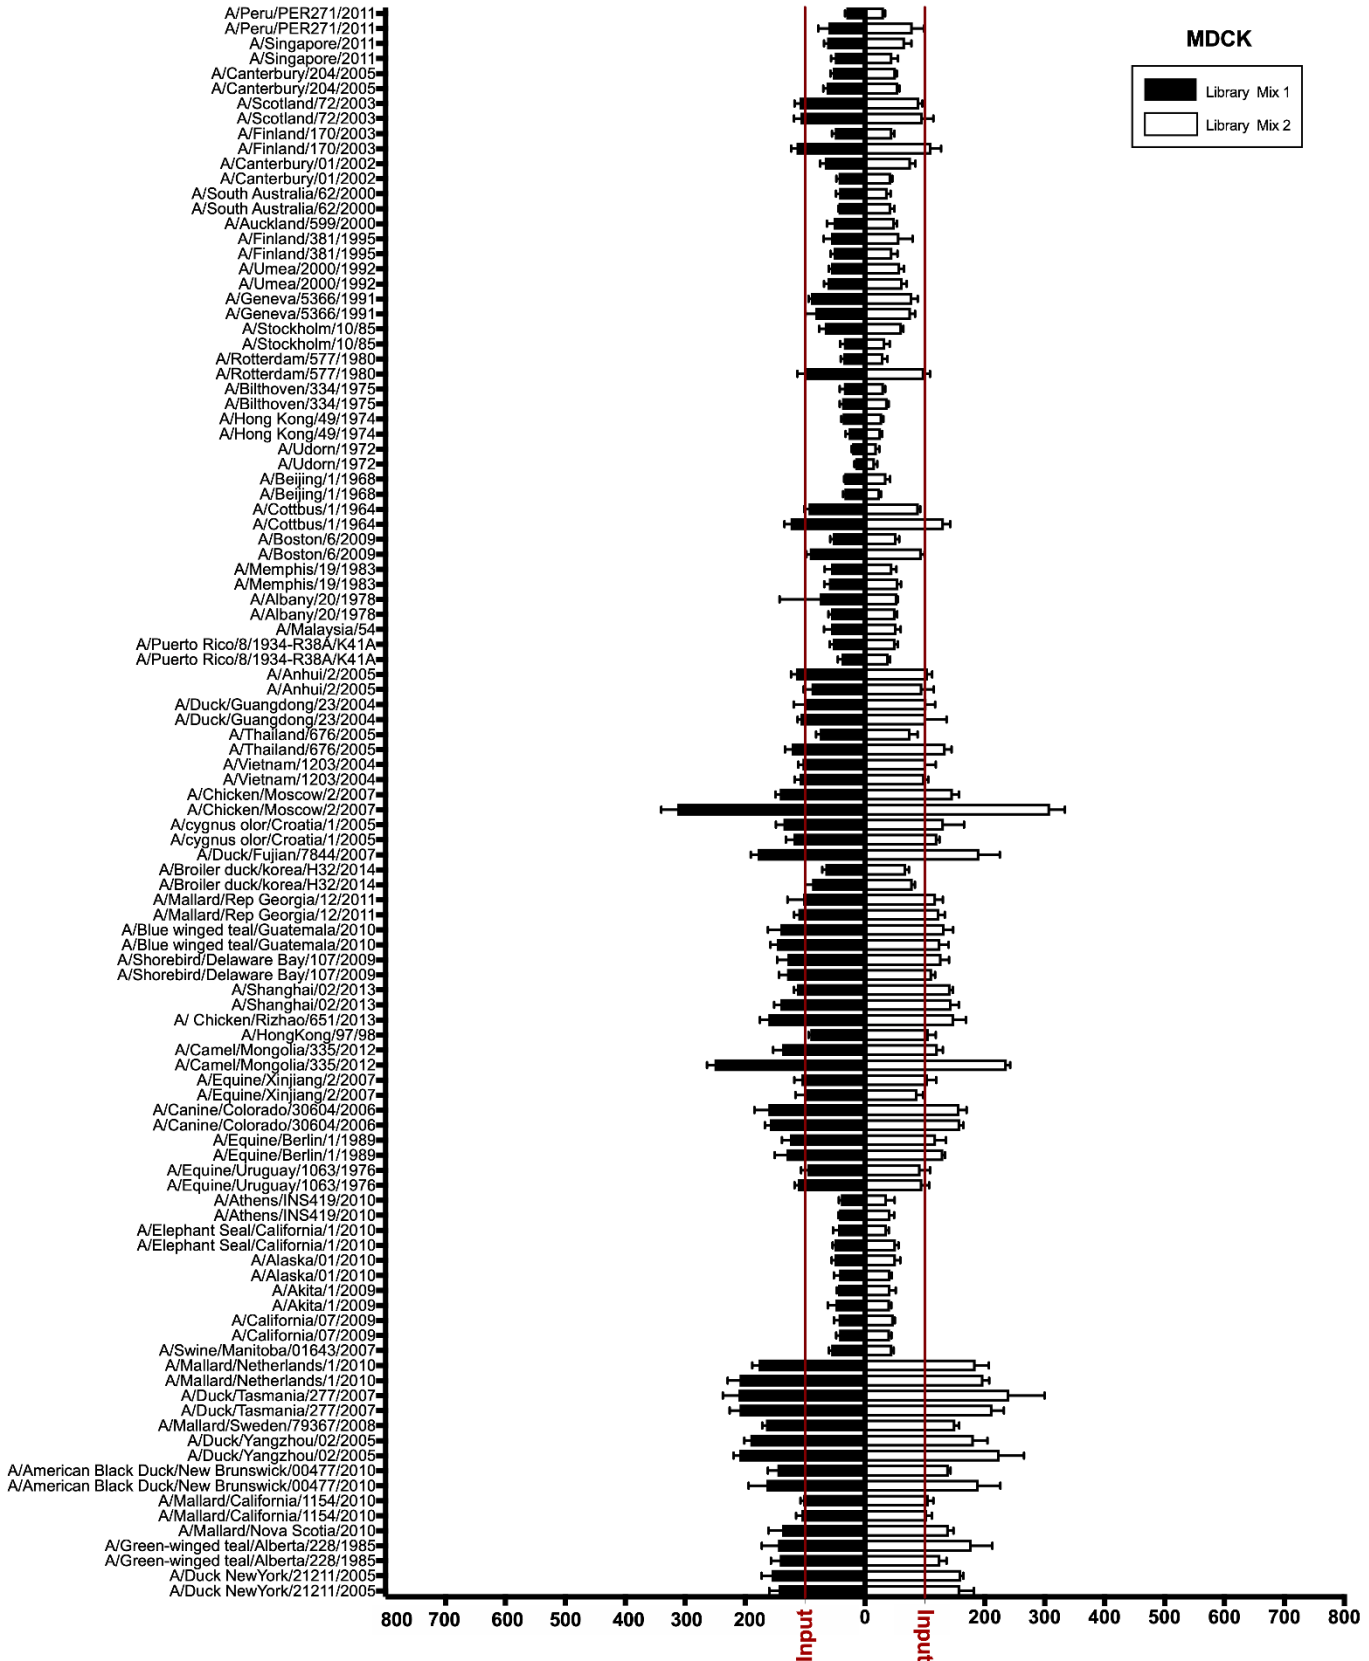

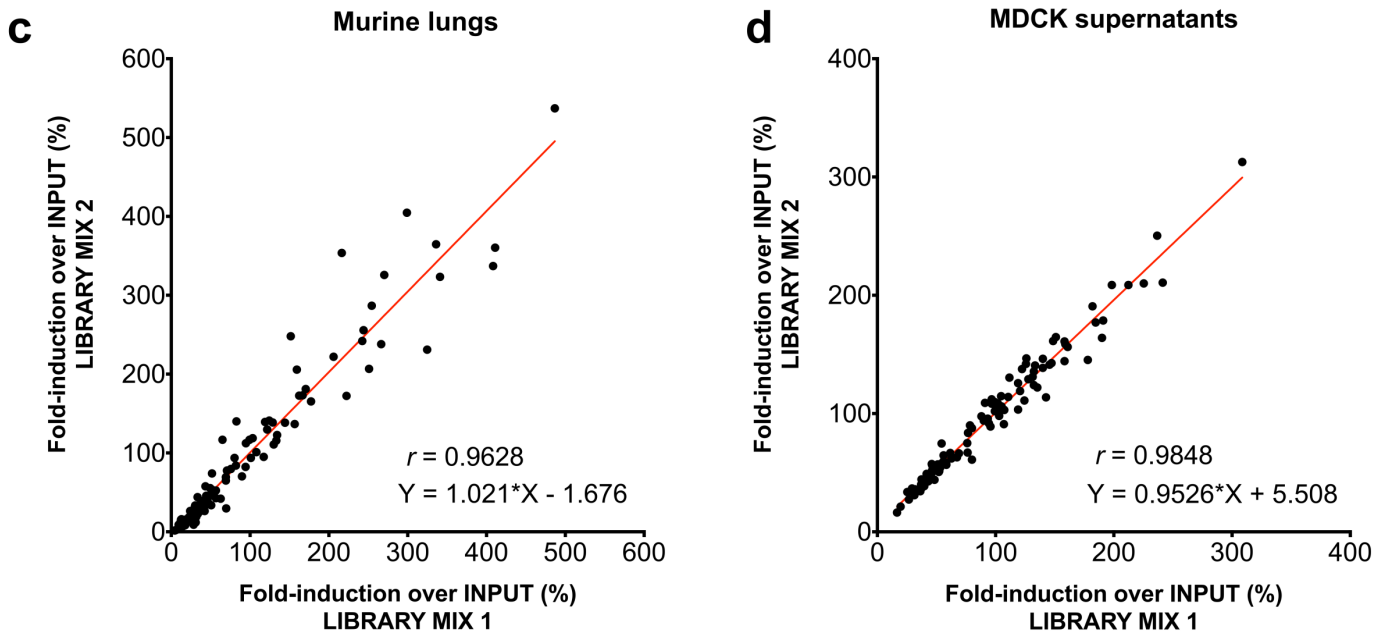

**Data S1, related to Figure 2. Validating the reproducibility of our NS1 recombinant viral library *in vitro* and *in vivo*.** Two independent viral library sets (100 pfu/virus) were used to infect 8-week-old female BALB/c mice (a) and MDCK cells (b) in triplicates. Relative barcode abundance was analyzed at 48 hours post-infection. Results are expressed as the fold-induction percentage over the initial relative proportion of barcode reads found in the initial viral mix (input, red dotted line). Scatter plots expressing the fold induction (%) over the input after infecting BALB/c mice (c) and MDCK cells (d) in triplicates with two different pools of library (Library Mix 1 or 2). Error bars depict the standard deviation (SD). Two-tailed paired t tests between independent library mixes were used to obtain Pearson correlation coefficients (r), with linear regression analysis.



# DATA S2

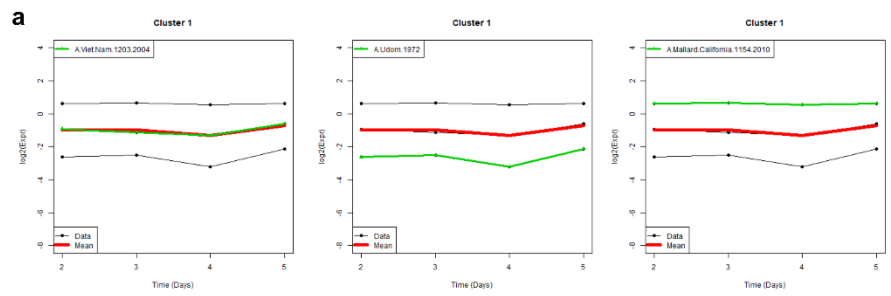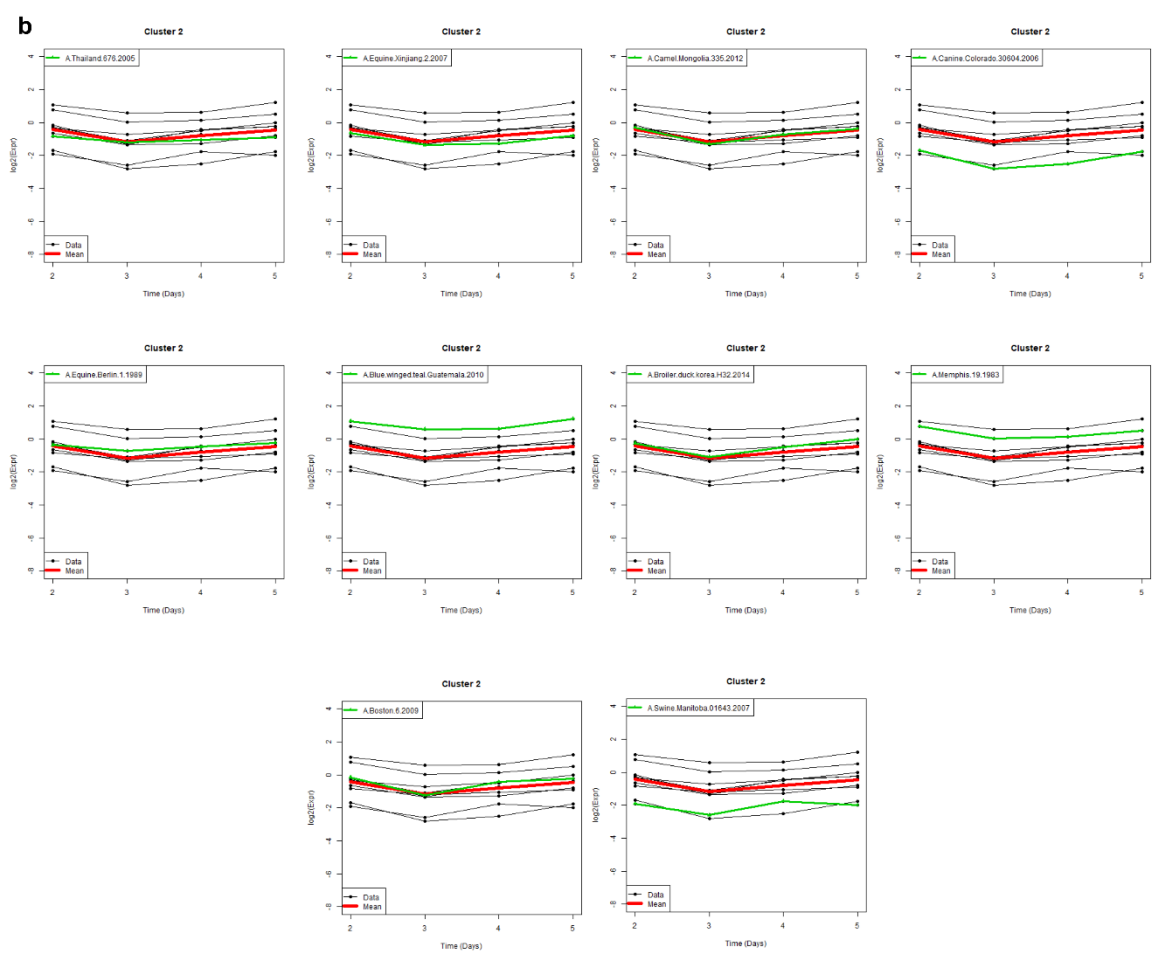

**C**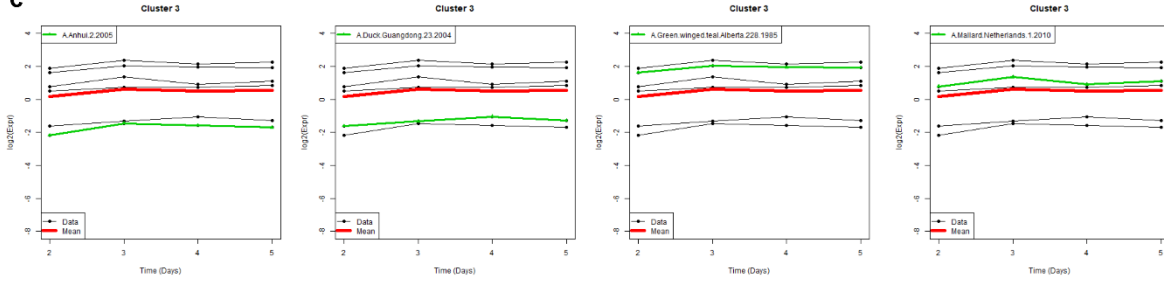**d**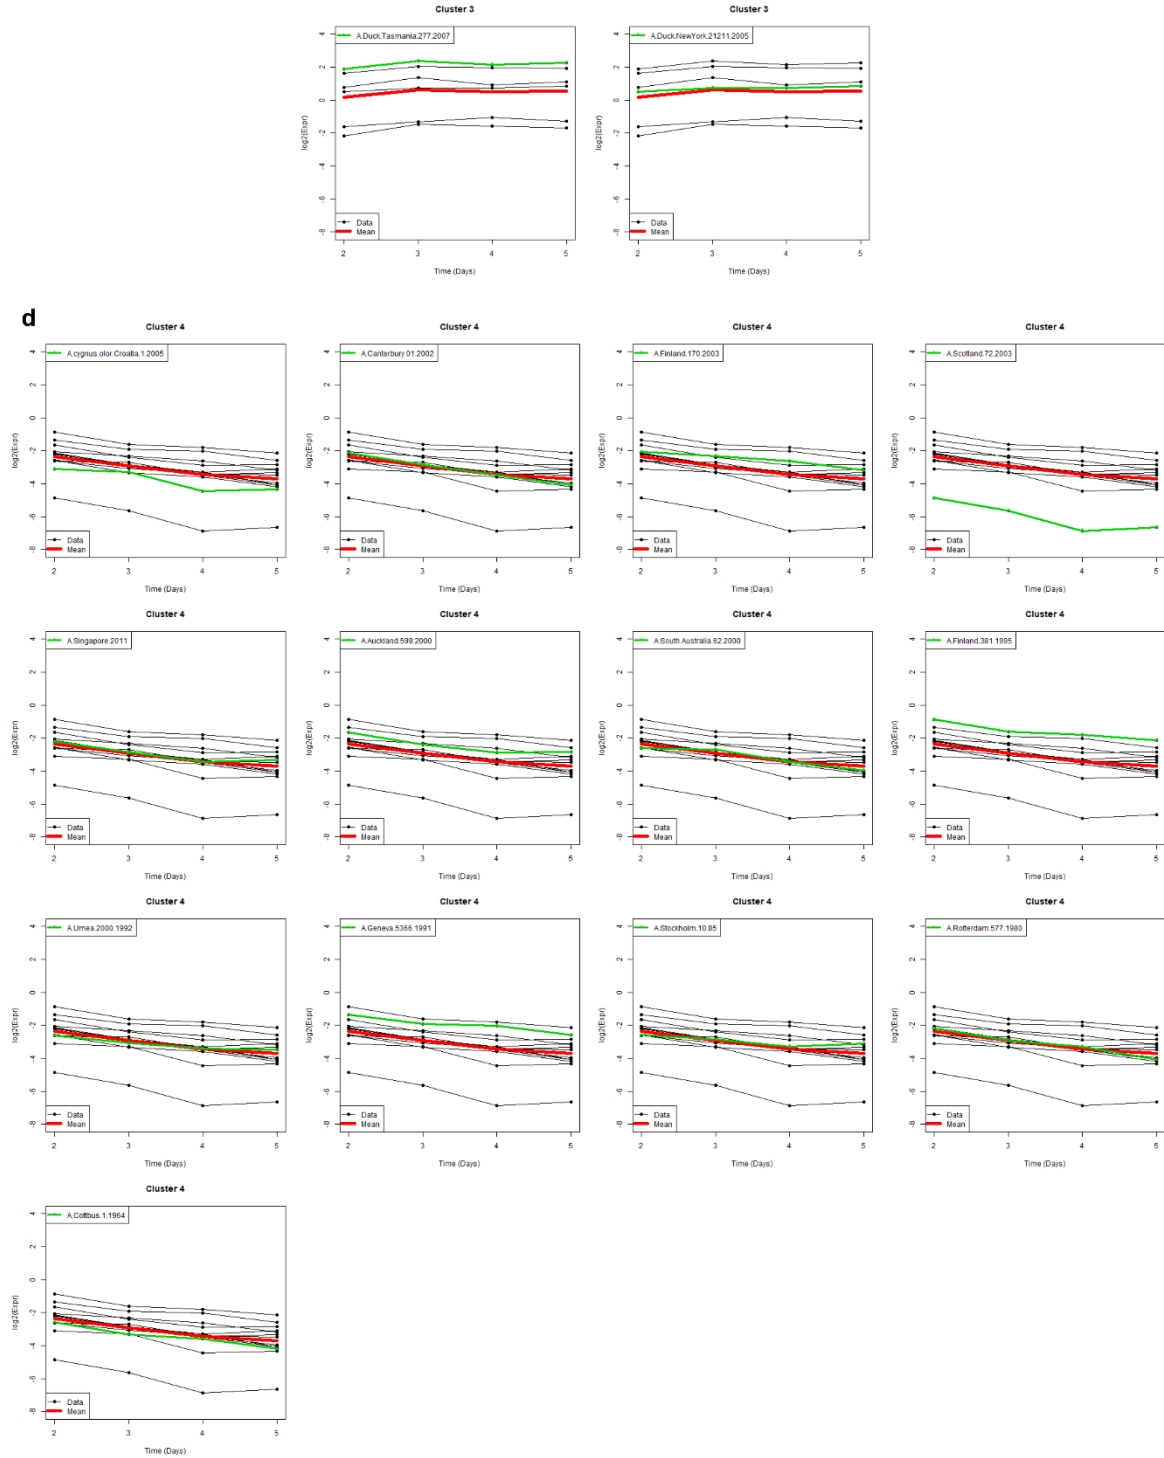

**e**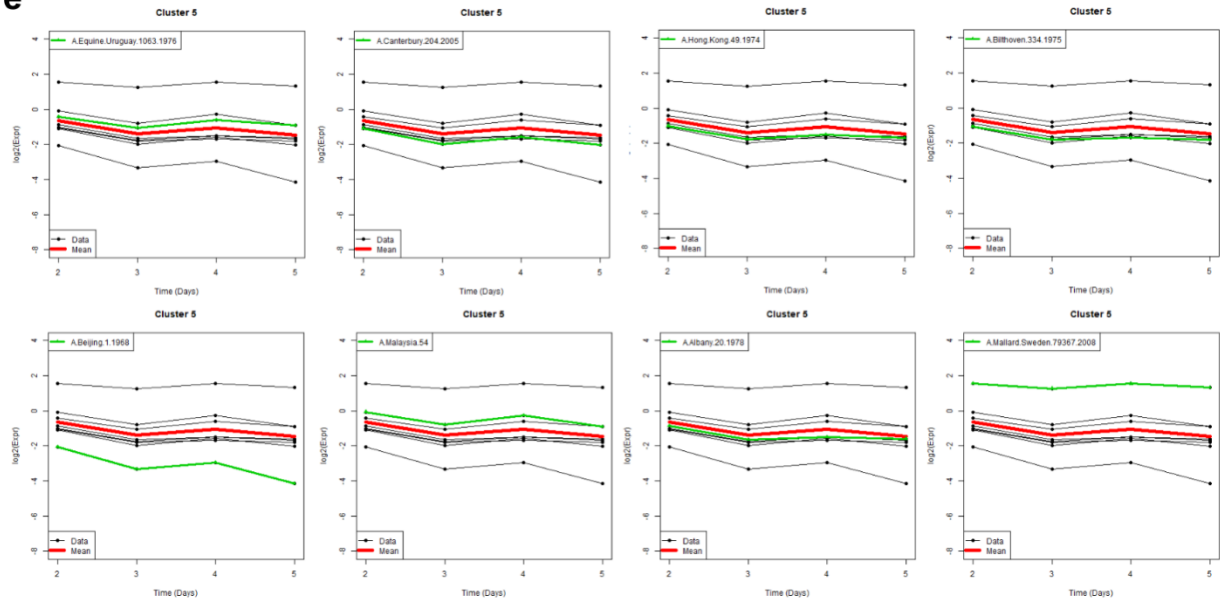**f**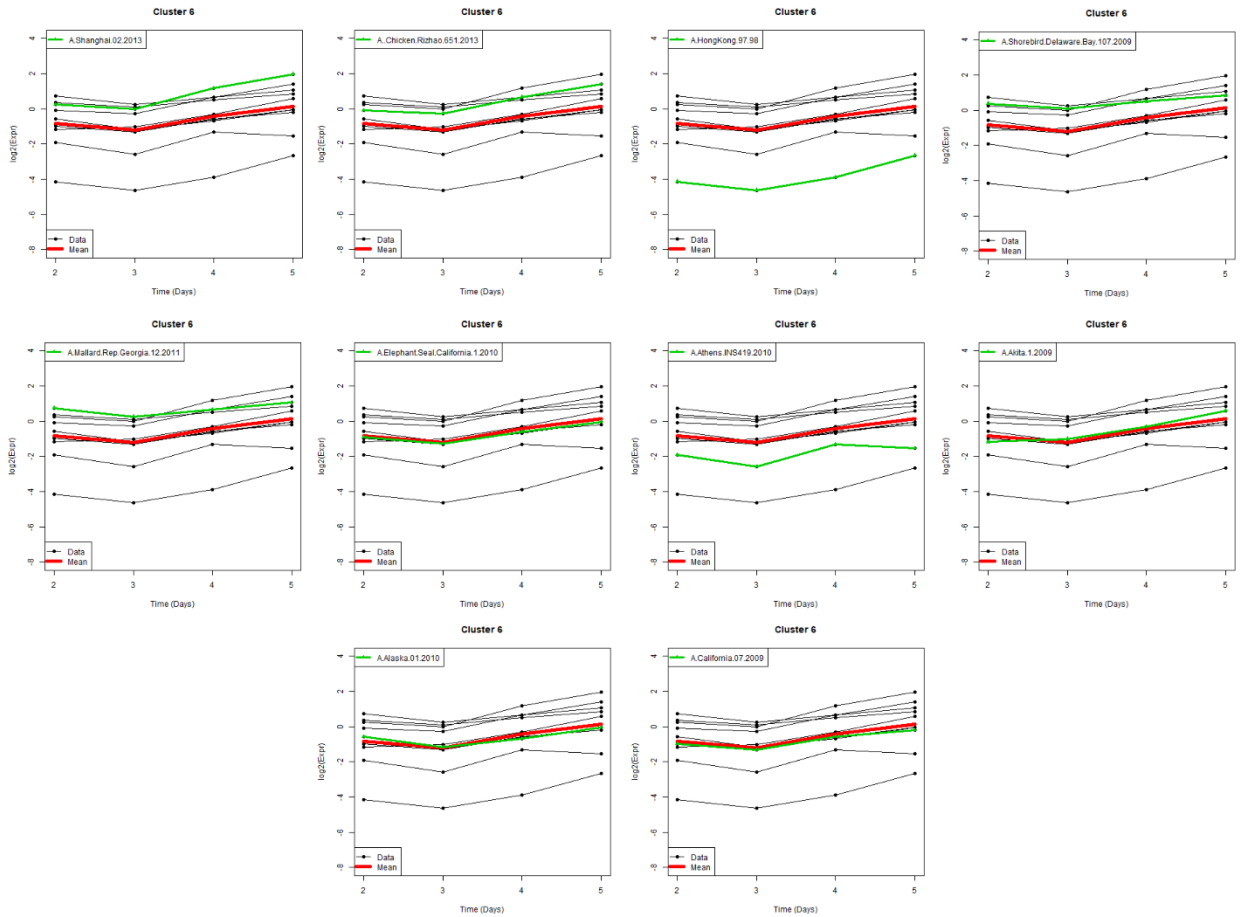

**g**

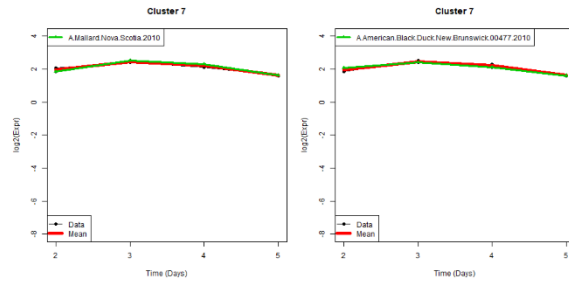

**Data S2, related to Figure 6. Time course analysis of clusters in Figure 6.** Barcode reads for each recombinant virus within clusters 1 (a), 2 (b), 3 (c), 4 (d), 5 (e), 6 (f) and 7 (g) at days 2, 3, 4 and 5 post-infection were plotted (black arrows). Each panel highlights a data set of a particular virus (green) and the average values of the whole cluster (red).

**TABLE S1**

| <b>List of barcode sequences used in the viral library</b> |                         |                                   |
|------------------------------------------------------------|-------------------------|-----------------------------------|
| <b>Barcode #</b>                                           | <b>Sequence</b>         | <b>NS1 strain</b>                 |
| BC1                                                        | ATTTATATAAGCAGCTAACTGT  | A/Udorn/1972                      |
| BC2                                                        | ATATTGATTAACAACTAGCCA   | A/Puerto Rico/8/1934              |
| BC3                                                        | ATAGCTTACCGGACTCGGTGCC  | A/Puerto Rico/8/1934 R38A/K41A    |
| BC4                                                        | TAAAATTGCGATTCACTGGCCT  | A/Shanghai/02/2013                |
| BC5                                                        | TACAGTTAGCATAAGATGTGAG  | A/Udorn/1972                      |
| BC6                                                        | TTTGTTTATATTTAACAGTGTG  | A/Puerto Rico/8/1934              |
| BC7                                                        | TTTCAGCATGAGAATCTCCTTC  | A/Puerto Rico/8/1934 R38A/K41A    |
| BC8                                                        | CTGCTCTTTGGCTGAATGGGCC  | A/Shanghai/02/2013                |
| BC9                                                        | AATTAATTTCACTGACTTCGGC  | Akita/1/2009                      |
| BC10                                                       | ATAACCTGAAAGTACATATGCT  | Akita/1/2009                      |
| BC11                                                       | ATAATGTCCCTCAATGTCGGCC  | A/Alaska/01/2010                  |
| BC12                                                       | ATTTGGGCTGCCATGTCCAGGA  | A/Alaska/01/2010                  |
| BC13                                                       | TATACAAATTATATTATGTCCG  | A/Albany/20/1978                  |
| BC14                                                       | TTCTGTTAGAAGTGCAGCATAT  | A/Albany/20/1978                  |
| BC15                                                       | TTCAATCAATATCCAATTCCTC  | A/Anhui/2/2005                    |
| BC16                                                       | CTTCAAAGTCTTCTAAGATCCG  | A/Anhui/2/2005                    |
| BC17                                                       | AATAATCTCCACAGCCATCCAT  | A/Athens/2010                     |
| BC18                                                       | TAAATCCATTATGTACTTGGTC  | A/Athens/2010                     |
| BC19                                                       | TTTAACCCATTAATAATATGCA  | A/Auckland/2000                   |
| BC21                                                       | TTTGGTGATGAATGACGCTGGC  | A/Beijing/1/1968                  |
| BC22                                                       | ATTGATTTATTCAGTAACCGGA  | A/Beijing/1/1968                  |
| BC23                                                       | AATATCAACAAGTAGTCCCGCT  | A/Bilthoven/334/1975              |
| BC24                                                       | TTAAACTTTCTGGGAGATGGCC  | A/Bilthoven/334/1975              |
| BC25                                                       | TTAAGCCAGCTAATAAAGAGTC  | A/Blue winged teal/Guatemala/2010 |
| BC26                                                       | TTATATAAACTCAGGACCGCCA  | A/Blue winged teal/Guatemala/2010 |
| BC27                                                       | TTACACCACTACATTGAAGGAT  | A/Boston/6/2009                   |
| BC28                                                       | TTTGGTTTGCCTGGAGATGCCA  | A/Boston/6/2009                   |
| BC31                                                       | TATATCTGTGTTTGTCCGAGAC  | A/Broiler_duck/korea/2014         |
| BC32                                                       | TTAAATTCTCCACTCAGGTGGA  | A/Broiler_duck/korea/2014         |
| BC33                                                       | ACAATTCCTTCTGCAAGCGGT   | A/California/07/2009              |
| BC34                                                       | TTCATCAAAGATATTCTTGGTG  | A/California/07/2009              |
| BC35                                                       | ATTTCAAATAACAGATTAAGTT  | A/Camel/Mongolia/2012             |
| BC36                                                       | TTCATATGGCCCGTGCTTAGCC  | A/Camel/Mongolia/2012             |
| BC37                                                       | TATAGTGATGCCGTTGTCAAGT  | A/Canine/Colorado/2006            |
| BC38                                                       | ATAACCCCTTATGTTCAAATGGA | A/Canine/Colorado/2006            |
| BC39                                                       | TTAACTTCTCTTCTTGTAAGGC  | A/Canterbury/01/2002              |
| BC40                                                       | TTCTGTAATAATATTCCAGGCC  | A/Canterbury/01/2002              |
| BC41                                                       | AATGTTGAACACAAGTTGCTC   | A/Canterbury/204/2005             |
| BC42                                                       | TTCTTAAATAAGAATAAGAGCC  | A/Canterbury/204/2005             |
| BC43                                                       | GTCTAATACGATAATAAGCCGG  | A/Moscow/2007                     |
| BC44                                                       | TTTCTCGTGATACTTCAATGGG  | A/Moscow/2007                     |
| BC47                                                       | TTTGGCGATGATAATTGTAGGG  | A/ Rizhao/2013                    |
| BC48                                                       | ATAACAAGAATTAGATATCTT   | A/ Rizhao/2013                    |
| BC49                                                       | TTAATGGAGAGCTGGCTGGCCT  | A/Cottbus/1964                    |
| BC50                                                       | TAGCTCATAGATGTAGTGTCTG  | A/Cottbus/1964                    |
| BC51                                                       | TATATTTCAAGCATGACAGACCA | A/Cygnus olor/2005                |
| BC52                                                       | TTTCTGGATGGATCACTGGGTG  | A/Cygnus olor/2005                |

|       |                         |                                 |
|-------|-------------------------|---------------------------------|
| BC53  | ATTCATTAATCTTTACAGTGCG  | A/Fujian/2007                   |
| BC54  | TATTGTGTTAATTATGGATGAA  | A/Fujian/2007                   |
| BC55  | TATACCTCTGAGGTTTCTTCCA  | A/Guangdong/2004                |
| BC56  | TTAACGTAGACTTTCAGCTGCA  | A/Guangdong/2004                |
| BC57  | ATCATCTGACTCATGATAGGTC  | A/Equine/Berlin/1989            |
| BC58  | TTACTTCATTCACTTGTGTGTT  | A/Equine/Berlin/1989            |
| BC59  | ATTCGTCATAATTCATGATCTT  | A/Equine/Uruguay/1976           |
| BC60  | TTATTATCTTGGATAAGGAGGC  | A/Equine/Uruguay/1976           |
| BC61  | TAACAGTTACTTATCTAATCCC  | A/Equine/Xinjiang/2007          |
| BC62  | TTTCTGGTAATGACGAAGGGTC  | A/Equine/Xinjiang/2007          |
| BC63  | TACAATCTCGATCTTACTGCGA  | A/Finland/2003                  |
| BC64  | CATTCATCTCCATTGCATTGGA  | A/Finland/2003                  |
| BC65  | TAGTGAAGCCACAGATGTA     | A/Finland/95                    |
| BC66  | ATATTACATAAATTTATCATGC  | A/Finland/95                    |
| BC69  | TAATTGTGGATGGATTGGAGAT  | A/Geneva/1991                   |
| BC70  | TTTCCGATCATCCTGAAGAGGC  | A/Geneva/1991                   |
| BC71  | TTAATTATCTTTCAAACGAGGA  | A/Hong Kong/1974                |
| BC72  | ATAATCTTCTGCGAATGTGGG   | A/Hong Kong/1974                |
| BC75  | TTGCTTTAAATCTCTCCTTGGA  | A/Malaysia/54                   |
| BC77  | TTTCTAAGTAACCAACATAGCC  | A/Rep Georgia/2011              |
| BC78  | ATCTGATATGGCAATCTTTCCT  | A/Rep Georgia/2011              |
| BC79  | TAAGTCCAAACTCCTTAACAGC  | A/Memphis/1983                  |
| BC80  | TTAATATGTCAAATCCATATTG  | A/Memphis/1983                  |
| BC81  | ATAACTCCTTACATTTACCCAA  | A/Peru/2011                     |
| BC82  | ATATGTAAACTCTAGGACGTTG  | A/Peru/2011                     |
| BC83  | ATAAGGTGACACAGGAACATAC  | A/Rotterdam/1980                |
| BC84  | ATATCTGGAGTAAGAAACAGAG  | A/Rotterdam/1980                |
| BC85  | ATTAAGCATCATAATCAGGA    | A/Scotland/2003                 |
| BC86  | AAGATGAGACATCTTGTAAGCA  | A/Scotland/2003                 |
| BC89  | TTTCCAGTCACTTTTGTCTGCT  | A/Shorebird/Delaware/2009       |
| BC90  | TTAGAGTAATCTCCAATCAGCT  | A/Shorebird/Delaware/2009       |
| BC91  | TTGAAATTTCTGTAGGAGATT   | A/Singapore/2011                |
| BC92  | TTAGCGCTGGAGCCCAGGTGAC  | A/Singapore/2011                |
| BC93  | TTACTTAAAGCCGGTGGTGCCG  | A/South Australia/2000          |
| BC94  | TTCCAGTTTAGTTATCTGAGCG  | A/South Australia/2000          |
| BC95  | TAATAGCTAAGTTATTACAGGC  | A/Stockholm/85                  |
| BC96  | TTTCAAAGCAAATTAATACAG   | A/Stockholm/85                  |
| BC97  | TTGCCATGGATAAGTAATTGGT  | A/Manitoba/2007                 |
| BC98  | TAATGCTAACAACAACAACCA   | A/Manitoba/2007                 |
| BC101 | ATGGAAATTACAAGTAGGAGCC  | A/Thailand/2005                 |
| BC102 | TTAGTTCCTGCCTGCTTGAGGT  | A/Thailand/2005                 |
| BC103 | TTAATAATTCATTTAGGAGCCG  | A/Umea/92                       |
| BC104 | AATTGTATACATCCTCCGAGGG  | A/Umea/92                       |
| BC105 | ATTACTTTGAGAACTTAAAGCA  | A/Black Duck/New Brunswick/2010 |
| BC106 | ATAAGTTTTCGTCATAACTCGCC | A/Black Duck/New Brunswick/2010 |
| BC107 | TTCCAGGTTACATACGACTGCG  | A/Duck New York/21211/2005      |
| BC108 | TAATGCCAGGTGAAATTCTCTC  | A/Duck New York/21211/2005      |
| BC109 | TTGTGCCTACTGCCTCGGAATT  | A/Tasmania/2007                 |
| BC110 | TTATCTTCTCAGCCAGATCCGT  | A/Tasmania/2007                 |
| BC111 | TTCTCTTAAAGGGCAGTGTCAG  | A/Duck/Yangzhou/02/2005         |
| BC112 | TATGAGAATAAGGATGAGAGGT  | A/Duck/Yangzhou/02/2005         |
| BC113 | TACAATGATAAGAGAAGCACCA  | A/Mallard/California/1154/2010  |
| BC114 | ATATTACAAGGCTTGAAAGGT   | A/Mallard/California/1154/2010  |

|       |                        |                                   |
|-------|------------------------|-----------------------------------|
| BC115 | AAGTCGCCCTACGGCGGGTGCC | A/green-winged teal/1985          |
| BC116 | TTTCATATATGGGTTCTCACAG | A/green-winged teal/1985          |
| BC117 | AATAGTCCAGAATTTCACTGGC | A/Mallard/Netherlands/2010        |
| BC118 | TTAATAGCATCGTATTTGTCCT | A/Mallard/Netherlands/2010        |
| BC120 | TTACCACAAGAAATAAGACCA  | A/Mallard/Nova Scotia/2010        |
| BC121 | TTAAGATAAACAGGATTCAGCC | A/Mallard/Sweden/2008             |
| BC123 | ATAGAGGTCAGAGAGTCGTCCC | A/Elephant Seal/California/1/2010 |
| BC124 | GACATTCATAACAGCAAATGGC | A/Elephant Seal/California/1/2010 |
| BC125 | TATTAGTCATACATCTTCCTTG | A/Hong Kong/97/98                 |
| BC127 | TTTCTCAAACAGCTGGTAACGC | A/Vietnam/1203/2004               |
| BC128 | AATATAAGTATCTTTAGCGGCG | A/Vietnam/1203/2004               |

**Table S1, related to STAR Methods. List of barcode sequences used in the viral library.**

**TABLE S2****List of primers used for the deep-sequencing analysis**

| <b>Primer Name</b>  | <b>Sequence</b>                                                                             |
|---------------------|---------------------------------------------------------------------------------------------|
| 3-Ambi-NS           | GATCGCTCTTCTGGGAGCaAAAGCAGGgtgac                                                            |
| 5-SAP-NS            | CATCGCTCTTCTATTAGTAGAAACAAGGgtggtt                                                          |
| Illumina_mir30_F    | AATGATACGGCGACCACCGAGATCTACACTCTTTCCCTACACGACGCTCTTCCGATCTTAGTGAAGCCACAGATGTA               |
| Illumina_mir30_R_1  | CAAGCAGAAGACGGCATAACGAGATaaaatcGTGACTGGAGTTCAGACGTGTGCTCTTCCGATCCAAAGTGATTTAATTTATACCATTTTA |
| Illumina_mir30_R_2  | CAAGCAGAAGACGGCATAACGAGATaccgccGTGACTGGAGTTCAGACGTGTGCTCTTCCGATCCAAAGTGATTTAATTTATACCATTTTA |
| Illumina_mir30_R_3  | CAAGCAGAAGACGGCATAACGAGATacgtaGTGACTGGAGTTCAGACGTGTGCTCTTCCGATCCAAAGTGATTTAATTTATACCATTTTA  |
| Illumina_mir30_R_4  | CAAGCAGAAGACGGCATAACGAGATagagagGTGACTGGAGTTCAGACGTGTGCTCTTCCGATCCAAAGTGATTTAATTTATACCATTTTA |
| Illumina_mir30_R_5  | CAAGCAGAAGACGGCATAACGAGATagtagaGTGACTGGAGTTCAGACGTGTGCTCTTCCGATCCAAAGTGATTTAATTTATACCATTTTA |
| Illumina_mir30_R_6  | CAAGCAGAAGACGGCATAACGAGATatgggtGTGACTGGAGTTCAGACGTGTGCTCTTCCGATCCAAAGTGATTTAATTTATACCATTTTA |
| Illumina_mir30_R_7  | CAAGCAGAAGACGGCATAACGAGATcaatggGTGACTGGAGTTCAGACGTGTGCTCTTCCGATCCAAAGTGATTTAATTTATACCATTTTA |
| Illumina_mir30_R_8  | CAAGCAGAAGACGGCATAACGAGATcataatGTGACTGGAGTTCAGACGTGTGCTCTTCCGATCCAAAGTGATTTAATTTATACCATTTTA |
| Illumina_mir30_R_9  | CAAGCAGAAGACGGCATAACGAGATcgctaaGTGACTGGAGTTCAGACGTGTGCTCTTCCGATCCAAAGTGATTTAATTTATACCATTTTA |
| Illumina_mir30_R_10 | CAAGCAGAAGACGGCATAACGAGATcggcgcGTGACTGGAGTTCAGACGTGTGCTCTTCCGATCCAAAGTGATTTAATTTATACCATTTTA |
| Illumina_mir30_R_11 | CAAGCAGAAGACGGCATAACGAGATctgacgGTGACTGGAGTTCAGACGTGTGCTCTTCCGATCCAAAGTGATTTAATTTATACCATTTTA |
| Illumina_mir30_R_12 | CAAGCAGAAGACGGCATAACGAGATgattcaGTGACTGGAGTTCAGACGTGTGCTCTTCCGATCCAAAGTGATTTAATTTATACCATTTTA |
| Illumina_mir30_R_13 | CAAGCAGAAGACGGCATAACGAGATgcctgtGTGACTGGAGTTCAGACGTGTGCTCTTCCGATCCAAAGTGATTTAATTTATACCATTTTA |
| Illumina_mir30_R_14 | CAAGCAGAAGACGGCATAACGAGATgcccagGTGACTGGAGTTCAGACGTGTGCTCTTCCGATCCAAAGTGATTTAATTTATACCATTTTA |
| Illumina_mir30_R_15 | CAAGCAGAAGACGGCATAACGAGATgtacgaGTGACTGGAGTTCAGACGTGTGCTCTTCCGATCCAAAGTGATTTAATTTATACCATTTTA |
| Illumina_mir30_R_16 | CAAGCAGAAGACGGCATAACGAGATgtcaacGTGACTGGAGTTCAGACGTGTGCTCTTCCGATCCAAAGTGATTTAATTTATACCATTTTA |
| Illumina_mir30_R_17 | CAAGCAGAAGACGGCATAACGAGATtaccttGTGACTGGAGTTCAGACGTGTGCTCTTCCGATCCAAAGTGATTTAATTTATACCATTTTA |
| Illumina_mir30_R_18 | CAAGCAGAAGACGGCATAACGAGATtaggacGTGACTGGAGTTCAGACGTGTGCTCTTCCGATCCAAAGTGATTTAATTTATACCATTTTA |
| Illumina_mir30_R_19 | CAAGCAGAAGACGGCATAACGAGATtcaacaGTGACTGGAGTTCAGACGTGTGCTCTTCCGATCCAAAGTGATTTAATTTATACCATTTTA |
| Illumina_mir30_R_20 | CAAGCAGAAGACGGCATAACGAGATtctgtgGTGACTGGAGTTCAGACGTGTGCTCTTCCGATCCAAAGTGATTTAATTTATACCATTTTA |

**Table S2, related to STAR Methods. List of primers used for the deep-sequencing analysis.**
